1 Article

# 2 Mouse vendor influence on the bacterial and viral gut 3 composition exceeds the effect of diet

4 Torben Sølbeck Rasmussen <sup>1,\*</sup>, Liv de Vries <sup>1</sup>, Witold Kot <sup>3</sup>, Lars Hestbjerg Hansen <sup>3</sup>, Josué L. Castro-Mejía  
5 <sup>1</sup>, Finn Kvist Vogensen <sup>1</sup>, Axel Kornerup Hansen <sup>2</sup>, Dennis Sandris Nielsen <sup>1,\*</sup>

6 <sup>1</sup> Dept. of Food Science, Faculty of Science, University of Copenhagen, 1958 Frederiksberg, Denmark; torben@food.ku.dk  
7 (T.S.R.); devries.liv@gmail.com (L.V.); jcame@food.ku.dk (J.C.M.); fkv@food.ku.dk (F.K.V.); dn@food.ku.dk (D.S.N.)

8 <sup>2</sup> Dept. of Veterinary and Animal Sciences, Faculty of Health and Medical Sciences, University of Copenhagen, 1870  
9 Frederiksberg, Denmark; akh@sund.ku.dk (A.K.H.)

10 <sup>3</sup> Dept. of Environmental Science, Aarhus University, 4000 Roskilde, Denmark; wk@envs.au.dk (W.K.); lhha@envs.au.dk  
11 (L.H.H.)

12 \* Correspondence: torben@food.ku.dk / +45 35 32 80 73 ; dn@food.ku.dk / +45 35 33 32 87

13 a

14 Received: 18-03-2019, Accepted: XXX; Published: XXX

15

16 **Abstract:** Often physiological studies using mice from one vendor show different outcome when being  
17 reproduced using mice from another vendor. These divergent phenotypes between similar mouse strains  
18 from different vendors have been assigned to differences in the gut microbiome. During recent years,  
19 evidence has mounted that the gut viral community plays a key role in shaping the gut microbiome and may  
20 thus also influence mouse phenotype. However, to date inter-vendor variation in the murine gut virome has  
21 not been studied. Using a metavirome approach, combined with 16S rRNA gene sequencing, we here  
22 compare the composition of the viral and bacterial gut community of C57BL/6N mice from three different  
23 vendors exposed to either a chow-based low-fat diet or high-fat diet. Interestingly, both the bacterial and the  
24 viral component of the gut community differed significantly between vendors. The different diets also  
25 strongly influenced both the viral and bacterial gut community, but surprisingly the effect of vendor  
26 exceeded the effect of diet. In conclusion, the vendor effect is substantial on not only the gut bacterial  
27 community, but also strongly influences viral community composition. Given the effect of GM on mice  
28 phenotype this is essential to consider, for increasing reproducibility of mouse studies.

29

30 **Keywords:** Bacteriophages, gut microbiota, animal model reproducibility, vendor effect, virome

31

## 32 1. Introduction

33 During the last decade the gut microbiome (GM) and its role in host health and disease has emerged as  
34 a rapidly expanding area of research [1,2]. Most GM studies focus on the bacterial gut component, whereas  
35 the archaeal, yeast, fungal, and viral (virome) components of the GM have been more sparsely investigated  
36 [3,4]. However, recently gut virome dysbiosis have been associated with flares of Crohn's disease and  
37 ulcerative colitis [5], *Clostridium difficile* associated diarrhoea [6] and type-2-diabetes [7] highlighting the  
38 importance of the virome in health and disease. The gut virome is predominated by prokaryotic viruses [8],  
39 also called bacteriophages (phages) which are viruses attacking bacteria in a host-specific manner. Phages  
40 are thought to play an important role in shaping the bacterial GM component [3,9,10], and is estimated to  
41 exist at least in the ratio of 1:1 to bacteria in the gut [11]. Interestingly, it has been shown that the bacterial  
42 and virome component of the GM respond to perturbations caused by a diet intervention in a  
43 desynchronized manner highlighting the potentially unique role of the virome in gut health [3]. Inbred mice

44 strains and controlled environments are often applied to minimise inter-individual variation. However, it  
45 has recently been questioned whether inbred mice really have a lower inter-individual variation compared  
46 to outbred mice [12], and traits previously thought to be caused by genetics have been shown to be related to  
47 the GM composition [13]. Several studies have shown that the bacterial component of the GM differs  
48 between the same mice strains obtained from different vendors [14], which directly influences the mice  
49 phenotype (e.g. disease expression) [15–17]. As an example, segmented filamentous bacteria (SFB) induces a  
50 robust T-helper cell type 17 (Th17) population in the small intestine of the mouse gut, but are only present in  
51 mice from some vendors [18]. Subsequently, Kriegel et al. demonstrated that SFB promotes protection  
52 against type-1-diabetes in Non-Obese Diabetic (NOD) mice [19]. Prolonged feeding with a high-fat (HF) diet  
53 is the standard protocol for inducing an obese phenotype in mice. It is well-established, that the HF diet also  
54 changes the bacterial component of the GM [20] and that GM composition is strongly correlated to the  
55 primary readouts of this model [21]. According to Howe et al. [3] also the viral community is affected by a  
56 HF diet. Here we report how both the choice of vendor and diet will affect the bacterial and the viral  
57 composition in C57BL/6N mice purchased from three different vendors. To our knowledge, no studies have  
58 yet simultaneously examined vendor and diet-dependent effects on both the bacterial and viral GM  
59 composition in mice.

## 60 2. Materials and Methods

### 61 2.1. Animals, diets and tissue/faecal sampling

62 All procedures regarding handling of the animals were carried out in accordance with the Directive  
63 2010/63/EU and the Danish Animal Experimentation Act with the licence ID: 2012-15-2934-00256. The  
64 present study included in total 54 C57BL/6N male mice purchased at age 5 weeks from three vendors,  
65 represented by 18 C57BL/6NTac mice (Taconic, Denmark), 18 C57BL/6NRj mice (Janvier, France), and 18  
66 C57BL/6NCrl mice (Charles River, Germany). Six mice from each vendor were sacrificed and sampled  
67 immediately after the arrival to assess the gut microbiome at baseline. The remaining 12 mice from each  
68 vendor were upon arrival housed at ambient temperature (20-24°C), 12h light/dark cycle, with a humidity at  
69 approx. 55%, shielded from ultrasounds >20kHz. The mice were divided into cages of 3 mice and randomly  
70 organised. Cages (Cat. no. 80-1290D001, Scanbur) were enriched with bedding, cardboard housing, tunnel,  
71 nesting material, felt pad, and biting stem (respectively Cat. no. 30983, 31000, 31003, 31008, 31007, 30968  
72 Brogaarden). One C57BL/6NTac mouse on HF diet was killed by a mouse in the same cage, and the two  
73 remaining mice were divided in individual cages. Animal housing was carried out at Section of  
74 Experimental Animal Models, University of Copenhagen, Denmark. For 13 weeks the mice were fed *ad*  
75 *libitum* high-fat diet (HF, Research Diets D12492, USA) or low-fat diet (LF, Research Diets D12450J, USA), see  
76 Figure 1. All mice were sacrificed by cervical dislocation and immediately added to an anaerobic jar (Cat.  
77 No. HP0011A, Thermo Scientific, USA) containing an anaerobic sachet (Cat. No. AN0035A AnaeroGen™,  
78 Thermo Scientific, USA) to maximize survival of obligate anaerobic bacteria and was thereafter transferred  
79 to an anaerobic chamber (Model AALC, Coy Laboratory Products, USA) for sampling. The atmospheric  
80 conditions in the chamber was ~1.5% H<sub>2</sub>, ~5% CO<sub>2</sub>, ~93.5% N<sub>2</sub>, and O<sub>2</sub> < 20 ppm. Faecal content from the mice  
81 cecum and colon was sampled and suspended in 800 µL autoclaved 1xPBS (NaCl 137mM, KCl 2.7 mM,  
82 Na<sub>2</sub>HPO<sub>4</sub> 10 mM, KH<sub>2</sub>PO<sub>4</sub> 1.8mM). All samples were immediately stored at -80°C.

83 ss

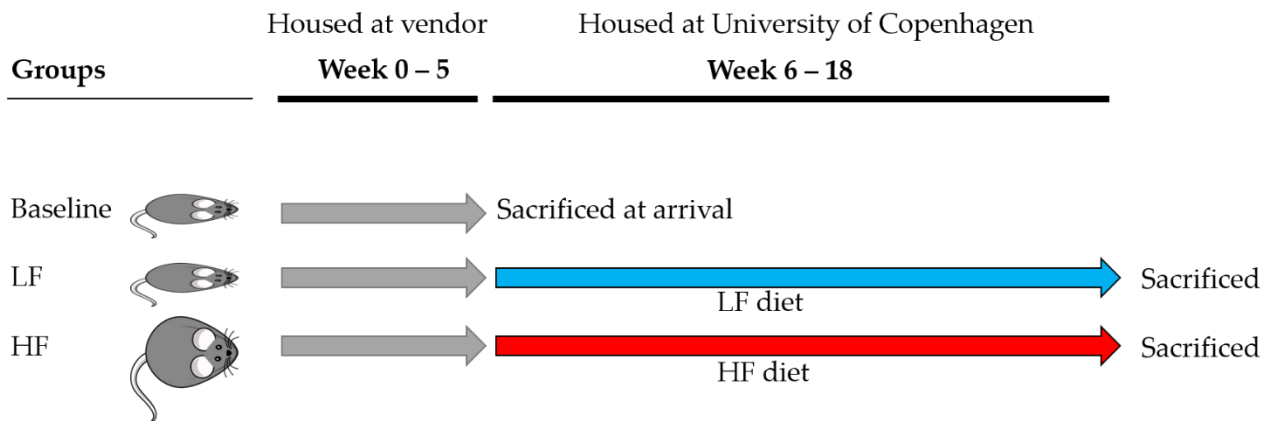

84

85 **Figure 1.** C57BL/6N mice were purchased from three different vendors: Taconic (TAC, n = 18), Charles River  
86 (CR, n = 18), and Janvier (JAN, n = 18). The baseline mice (n = 6 pr. vendor) were sacrificed at arrival and the  
87 low-fat (LF) and high-fat (HF) diet groups (n = 12 pr. vendor) were fed for 13 weeks before being sacrificed at  
88 endpoint.

### 89 2.2. Pre-processing of faecal samples prior virome and total DNA extraction

90 Cecum and colon samples were thawed and 300  $\mu$ L of suspended faecal content was mixed with 29 mL  
91 autoclaved 1x SM buffer (100 mM NaCl, 8 mM  $MgSO_4 \cdot 7H_2O$ , 50 mM Tris-Cl with pH 7.5), followed by  
92 homogenisation in BagPage+® 100 mL filter bags (Interscience, France) with a laboratory blender (Stomacher  
93 80, Seward, UK) at medium speed for 120 seconds. The filtered homogenised suspension was subsequently  
94 centrifuged using an Allegra™ 25R centrifuge (Beckman Coulter, USA) at 5000 x g for 30 min. at 4°C. The  
95 faecal supernatant was sampled for viral DNA extraction and the faecal pellet was re-suspended in 1x SM-  
96 buffer for bacterial DNA extraction. All laboratory procedures were performed aseptically and with  
97 BioSphere® filter tips to avoid contamination.

### 98 2.3. Bacterial DNA extraction, sequencing, and pre-processing of raw data

99 Tag-encoded 16S rRNA gene amplicon sequencing was performed on a Illumina NextSeq using v2 MID  
100 output 2x150 cycles chemistry (Illumina, CA, USA). DNA extraction and library building for amplicon  
101 sequencing was performed in accordance to Krych et al. [22]. The average sequencing depth (Accession:  
102 ANXXXXX, available at EMBL-EBI) for the cecum 16S rRNA gene amplicons was 318,395 reads (min. 47,182  
103 reads and max. 808,971 reads) and 168,388 reads for colon (min. 47,004 reads and max. 223,787 reads), see  
104 Table S1 for further details. The raw NextSeq generated dataset containing pair-ended reads, with  
105 corresponding quality scores, were merged and trimmed using fastq\_mergepairs and fastq\_filter scripts  
106 implemented in the UPARSE pipeline [23]. The minimum overlap length of trimmed reads was set to 100 bp.  
107 The minimum length of merged reads was 130 bp. The max expected error E = 2.0, and first truncating  
108 position with quality score  $N \leq 4$ . Purging the dataset from chimeric reads and constructing *de novo* zero-  
109 radius Operational Taxonomic Units (zOTUs) were conducted using the UNOISE pipeline [24]. The k-mer  
110 based SINTAX [25] algorithm was used to predict taxonomy using the Ribosomal Database Project (Release  
111 11, update 5) [26] as well as Greengenes (v13.8) [27] 16S rRNA gene collection as a reference database. The  
112 zOTU's will subsequently be referred to as bacterial OTU's (bOTU's) to differentiate from the viral  
113 counterpart. Bacterial density in the cecum and colon content was estimated by quantitative real-time  
114 polymerase chain reaction (qPCR) as previously described [21], using 16S rRNA gene primers (V3 region) as  
115 applied for the amplicon sequencing [22]. Standard curves were based on total DNA extracted from  
116 *Escherichia coli* K-12 containing 7 copies of the 16S rRNA gene.

117

#### 118 2.4. Viral DNA extraction and sequencing

119 The faecal supernatant from the pre-processing was filtered through 0.45 µm Minisart® High Flow PES  
120 syringe filter (Cat. No. 16533, Sartorius, Germany) to remove bacteria and other larger particles. The filtrate  
121 was concentrated using Centriprep® Ultracel® YM-50K units (Cat. No. 4310, Millipore, USA), which consist  
122 of an inner and outer tube. The permeate in the inner tube was discarded several times during centrifugation  
123 at 1500 x g at 25°C until approximately 500 µL was left in the outer tube. This was defined as the  
124 concentrated virome. The 50 kDa filter from the Centriprep® was removed by a sterile scalpel and added to  
125 the concentrated virome and stored at 4°C until DNA extraction. 140 µL of virome was treated with 2.5 units  
126 of Pierce™ Universal Nuclease (Cat. No. 88700, ThermoFisher Scientific, USA) for 3 min. prior to viral DNA  
127 extraction to remove free DNA/RNA molecules. Based on the NetoVIR protocol [28], the nucleases were  
128 inactivated by 560 µL AVL buffer from the QIAamp® Viral RNA Mini kit (Cat. No. 52904, Qiagen,  
129 Germany) used for viral DNA extraction. The NetoVIR protocol was followed from step 11-27, however the  
130 AVE elution buffer volume was adjusted to 30 µL. The extracted viral DNA were stored at -80°C prior to  
131 viral genome amplification. The Illustra Ready-To-Go GenomiPhi V3 DNA Amplification Kit (Cat. No. 25-  
132 6601-96, GE Healthcare Life Sciences, UK) was used for viral genome amplification (expected avg. size of 10  
133 kbp), and to include ssDNA viruses in downstream analysis. The instructions of the manufacturer were  
134 followed, however the DNA amplification was changed to 30 min., instead of 90 min., to decrease the bias of  
135 preferential amplification of ssDNA viruses [29–31]. Genomic DNA Clean & Concentrator™-10 units (Cat.  
136 No D4011, Zymo Research, USA) were used to remove DNA molecules below 2kb according to the  
137 instructions of manufacturer. Prior library construction, the DNA concentrations of the clean products were  
138 measured by Qubit HS assay Kit (Cat. No. Q32854, Invitrogen, USA) using a Varioskan Flash 3001 (Thermo  
139 Scientific, USA). Viral DNA libraries were generated by Nextera XT DNA Library Preparation Kit (Cat. No.  
140 FC-131-1096, Illumina, USA) by a slightly modified manufactures protocol divided into “ Genomic DNA  
141 tagmentation” and “PCR clean-up”. Genomic DNA tagmentation: 5µL Tagment DNA Buffer, 2.5µL genomic  
142 DNA (in total 0.5 ng DNA), 2.5 µL Amplicon Tagment Mix, incubated at 55°C for 5 min. followed by hold on  
143 10°C where 2.5 µL Neutralize Tagment Buffer was added and incubated at room temperature (RT) for 5 min.  
144 Then 7.5 µL Nextera PCR Mix and 2.5µL of each Nextera Index primers i5 and i7 were added to a total  
145 volume of 25 µL and followed by PCR on SureCycler 8800. Cycling conditions applied were: 72°C for 3 min.,  
146 95 °C for 30 s; 16 cycles of 95 °C for 30 s, 55°C for 30 s and 72°C for 30 s; followed by final step at 72 °C for 5  
147 min. PCR clean-up: 25 µL PCR product was mixed with AMPure XP beads (Beckman Coulter Genomic,  
148 USA), and incubated for 5 min. at RT and mounted to the magnetic stand for 2 minutes before continuing.  
149 The supernatant was removed, and each sample was washed with 150 µl of 80% ethanol twice. 27 µL of  
150 PCR-grade water was added, incubated at RT for 2 min., and mounted to a magnetic stand for 2 min. before  
151 sampling of 25µL clean DNA products. The average sequencing depth (Accession: ANXXXXX, available at  
152 EMBL-EBI) for the cecum viral metagenome was 829,533 reads (min. 212,545 reads and max. 1,621,360 reads)  
153 and 456,452 reads for colon (min. 63,183 reads and max. 643,913 reads), see Table S1 for further details.

#### 154 2.5. Processing of metagenome sequencing of VLPs and sequence-based knowledge

155 The raw reads were trimmed from adaptors and barcodes using Trimmomatic v0.35 (>97% quality [32]  
156 [seedMismatches: 2, palindromeClipThreshold: 30, simpleClipThreshold:10; LEADING: 15; MINLEN: 50],  
157 removed from ΦX174-control DNA and de-replicated (Usearch v10) [23]. Non-redundant/high-quality reads  
158 with a minimum size of 50 nt were retained for viromes reconstructions and downstream analyses. As  
159 quality control the presence of non-viral DNA was quantified using 50,000 random forward-reads from  
160 each sample, which were queried against the human genome, as well as all the bacterial and viral genomes  
161 hosted at NCBI using Kraken2 [33]. Similarly, reads were blasted against the non-redundant protein  
162 database available at UniProtKB/Swiss-Prot (-evalue 1e-3, -query\_cov 0.6, -id 0.7), the ribosomal 16S rRNA  
163 (GreenGenes v13.5 [27]) and 18S rRNA (Silva, release 126 [34]) databases (-evalue 1e-3, -query\_cov 0.97, -id  
164 0.97). For each sample, reads were subjected to within-sample *de-novo* assembly. For each sample, assembly  
165 was carried out using Spades v3.5.0 [35,36] [using paired and unpaired reads] and the scaffolds (here termed



166 “contigs”) with a minimum length of 1,000 nt were retained. Contigs generated from all samples were  
167 pooled and de-replicated by multiple blasting and removing those contained in over 90% of the length of  
168 another (90% similarity) contig, as outlined by Reyes et al. [37]. To check the presence of non-viral DNA  
169 contigs, de-replicated contigs were evaluated according to their match to a wide range of viral proteins,  
170 [viral non-redundant RefSeq, virus orthologous proteins ([www.vogdb.org](http://www.vogdb.org)), and the prophage/virus  
171 database at PHASTER ([www.phaster.ca](http://www.phaster.ca) [38]), reference independent k-mer signatures [VirFinder [39]], viral  
172 genomes RefSeq [Kraken2] as well as their match to bacterial [NCBI, Kraken2 (--confidence 0.08)], plant  
173 [NCBI, Kraken2 (--confidence 0.3)] and human genomes [NCBI, Kraken2 (--confidence 0.1)]. All contigs  
174 matching viral proteins, viral k-mers, including those that did not match any database, were subsequently  
175 retained and categorized as viral-contigs.

## 176 2.6. *Viral-Operational Taxonomic Unit (vOTU) designation*

177 Following assembly and quality control, high-quality/dereplicated reads from all samples were merged  
178 and recruited against all the assembled contigs at 95% similarity using Subread [40] and a contingency-table  
179 of reads per Kb of contig sequence per million reads sample (RPKM) was generated, here defined as the  
180 vOTU-table (viral-operational taxonomic unit). Taxonomy of contigs was determined by querying  
181 (USEARCH-ublast, e-value  $10^{-3}$ ) the viral contigs against a database containing taxon signature genes for  
182 virus orthologous group hosted at [www.vogdb.org](http://www.vogdb.org).

## 183 2.7. *Bioinformatic analysis of bacterial and viral communities*

184 Prior any analysis the raw read counts in the vOTU-tables were normalised by reads per kilo base per  
185 million mapped reads (RPKM) [41], since the size of the viral contigs are highly variable [42]. OTU's which  
186 persisted in less than 5% of the samples were discarded to reduce noise, however still maintaining an  
187 average total abundance close to 98%. Cumulative sum scaling [43] (CSS) was applied for analysis of  $\beta$ -  
188 diversity to counteract that a few bacterial and vOTU's represented larger count values, and since CSS have  
189 been benchmarked with a high accuracy for the applied metrics (Bray-Curtis, Sørensen-Dice, weighted-  
190 UniFrac, unweighted-Unifrac) [44]. CSS normalisation was executed using the Quantitative Insight Into  
191 Microbial Ecology 1.9.1 [45] (QIIME 1.9.1) `normalize_table.py`, an open source software package for Oracle  
192 Virtual Box (Version 5.2.26). The viral and bacterial  $\alpha$ -diversity analysis was based on, respectively, RPKM  
193 normalised and raw read counts to avoid bias with rarefaction [46]. This was supported by a comparison of  
194 the bacterial  $\alpha$ -diversity (Shannon Index) based on both the raw read counts and the rarefied read counts,  
195 see Figure S10. QIIME 2 (2019.1 build 1548866877) [45] plugins were used for subsequent analysis steps of  $\alpha$ -  
196 and  $\beta$ -diversity statistics. Weighted (w) and unweighted (u) UniFrac [47] dissimilarity metrics represented  
197 the bacterial phylogenetic  $\beta$ -diversity analysis, whereas the non-phylogenetic  $\beta$ -diversity analysis were done  
198 by Bray-Curtis dissimilarity and Sørensen-Dice. The Shannon, Simpson and Richness indices represented  
199 likewise the determined  $\alpha$ -diversity measures. The R-scripts `A-diversity.R`, `Taxonomic-Binning.R`, and  
200 `Serial-Group-Comparison.R` from the RHEA [48] pipeline (version 1.1.1.) were applied to detect taxonomy  
201 differences between groups with a relative abundance threshold at 0.25%. Wilcoxon Rank Sum Test  
202 evaluated pairwise taxonomic differences, whereas ANOSIM and Kruskal Wallis was used to evaluate  
203 multiple group comparisons. Venn diagrams were obtained with the web platform MetaCoMET [49], where  
204 bacterial and vOTU's with less than 100 reads in any sample were discarded, and shared OTU's were  
205 defined as present in 80% of the samples within a group (persistence).  
206

207 **3. Results**

208 Male C57BL/6N mice (n = 54) were purchased from Taconic (TAC), Charles River (CR), and Janvier  
 209 (JAN). One third of the mice were sacrificed at arrival, while the remaining were fed either a low-fat (LF)  
 210 diet or a high-fat (HF) diet for 13 weeks until endpoint. Cecum and colon content were sampled from each  
 211 individual mouse after being sacrificed. Here only results describing cecum samples will be reported.  
 212 Complete equivalent analysis of colon samples can be found in Figure S6 – S9. The bacterial density in cecum  
 213 samples was determined by qPCR to an average of  $1.52 \times 10^{10}$  –  $3.79 \times 10^{10}$  16S rRNA gene copies/g. A t-test  
 214 showed a significant lower count of 16S rRNA gene copies/g when comparing HF vs. LF (p = 0.0017) and HF  
 215 vs. baseline (p = 0.0008), and a significant difference (p < 0.0106) between the three vendors on LF diet, see  
 216 Figure S1.

217 **3.1. Gut microbiota diversity and composition of C57BL/6N mice from three vendors**

218 The effect of vendor (H = 14.4, p = 0.0007) on the bacterial Shannon diversity index exceeded the effect  
 219 of the diet, as the latter had no significant (H = 0.48, p = 0.488) impact, Figure 2. The Shannon index of the  
 220 viral community was affected significantly by both vendor and diet (p < 0.02, Figure 2). The effect of vendor  
 221 seemed maintained from baseline to endpoint for both the bacterial and viral community. When comparing  
 222 with the baseline, the bacterial and viral Shannon index of all three vendors decreased significantly (p <  
 223 0.025) after the mice were fed HF or LF diet, except for the viral community of JAN LF. Similar tendencies  
 224 were observed with other  $\alpha$ -diversity indices (Figure S2) and for an equivalent analysis of the colon samples  
 225 (Figure S6), along with statistically pairwise comparison of all groups (Table S2). The top 10 most abundant  
 226 vOTU's (viral contigs) represented from 65.2 to 93.9% (median at 81.8%) of the relative abundance in each  
 227 group, see Figure S11.

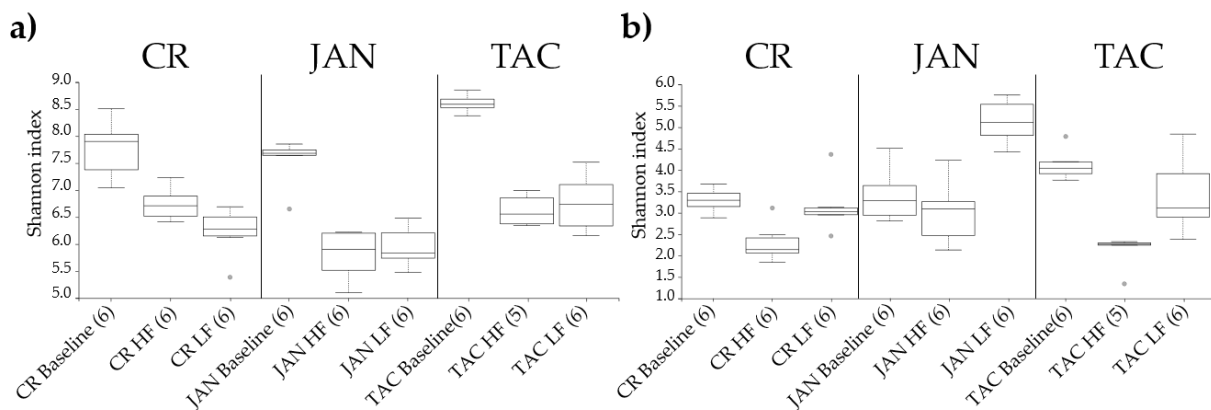

228

229

230

231

232

233

| Effect            | H      | p-value | Sample size | Sample type | Community |
|-------------------|--------|---------|-------------|-------------|-----------|
| Vendor - Endpoint | 14.479 | 0.0007  | 35          | Cecum       | Bacterial |
| Vendor - Baseline | 11.591 | 0.0030  | 18          | Cecum       | Bacterial |
| Diet              | 0.480  | 0.4880  | 35          | Cecum       | Bacterial |
| Vendor - Endpoint | 8.995  | 0.0111  | 35          | Cecum       | Viral     |
| Vendor - Baseline | 8.573  | 0.0137  | 18          | Cecum       | Viral     |
| Diet              | 13.421 | 0.0002  | 35          | Cecum       | Viral     |

**Figure 2.** Shannon index of the caecal a) bacterial and b) viral community at baseline (5 weeks of age) and after 13 weeks on low fat or high diet (18 weeks of age), respectively. The parentheses show the number of samples from each group included in the plot. c) Kruskal Wallis group analysis of the Shannon indices of the effects of diet and vendor at baseline and endpoint (18 weeks of age). Abbreviations: LF = low-fat diet, HF = high-fat diet, CR = Charles River, JAN = Janvier, TAC = Taconic.

234 Vendor strongly influenced both gut bacterial and viral composition (Figure 3). Also diet had a significant  
 235 effect, though not as pronounced as the vendor effect (as illustrated by the lower R-values, Figure 3c). The  
 236 viral and bacterial community of all vendors and diets at endpoint were pairwise significantly ( $p < 0.007$ )  
 237 separated ( $R > 0.652$ ), see Table S3. The  $\beta$ -diversity of both the bacterial and viral baseline community was  
 238 likewise mutually different ( $p \leq 0.006$ ). Similar results were observed for the colon microbiota (Figure S7),  
 239 and regardless of the  $\beta$ -diversity metric applied for the analysis, see Figure S3. The bacterial and viral  
 240 composition developed in similar directions from the baseline to the endpoint, however the unique  
 241 composition which originated from the vendor, maintained the separation.

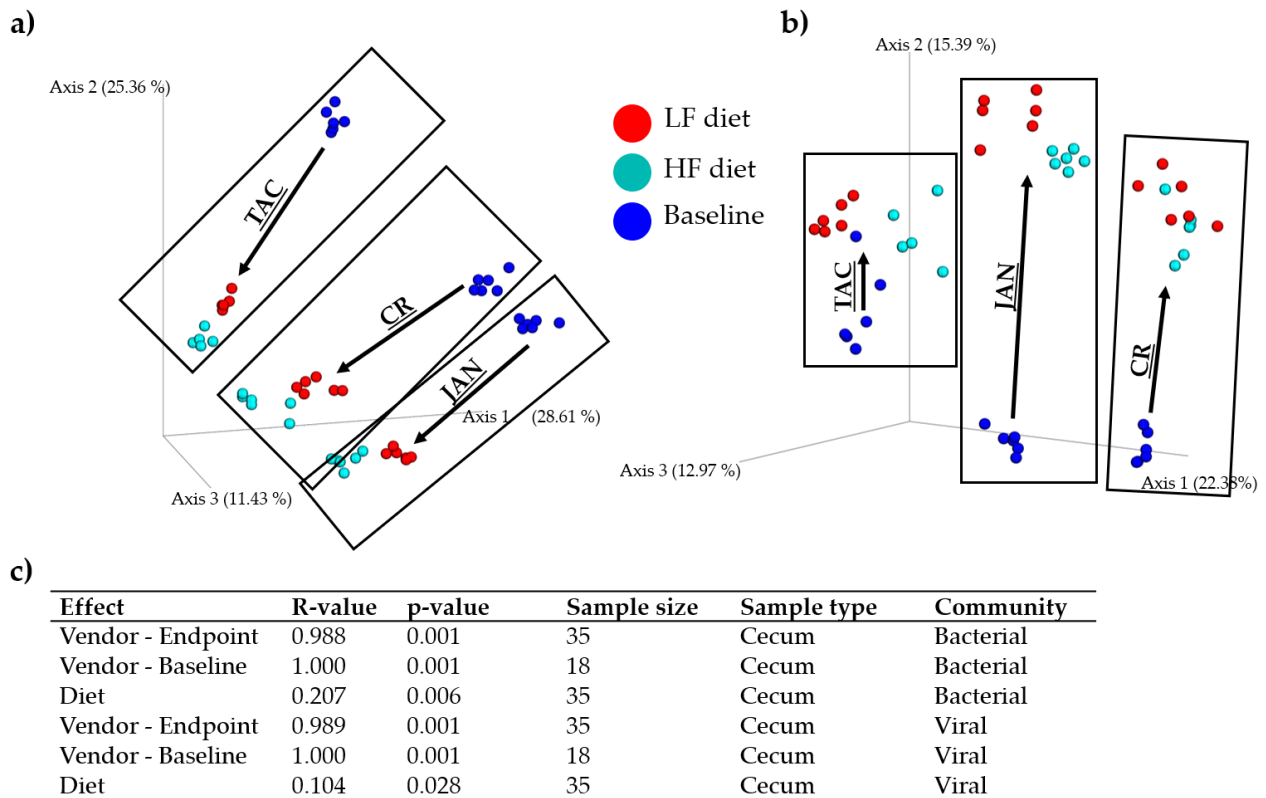

242

243 **Figure 3.** Bray Curtis dissimilarity metric PCoA based plots of a) the caecal bacterial community and b) viral  
 244 community at baseline (5 weeks of age) and after 13 weeks on low fat or high diet (18 weeks of age),  
 245 respectively. c) ANOSIM of the Bray Curtis distances of the effects of diet and vendor at baseline and  
 246 endpoint (18 weeks of age). CR = Charles River, JAN = Janvier, TAC = Taconic. Black boxes frame the samples  
 247 associated to the mice vendor.

248

249 3.2. Taxonomic abundance of the bacterial and viral components

250 Several abundant bacterial genera significantly ( $p < 0.05$ ) differed between the three vendors. Especially  
 251 *Prevotella* spp., *Alistipes* spp., *Desulfovibrio* spp., and *Akkermansia muciniphila* stood out, see Figure 4. TAC  
 252 mice had almost no *A. muciniphila*, *Prevotella* spp., or *Alistipes* spp. whereas JAN mice had higher abundance  
 253 of *Desulfovibrio* spp. compared to both CR and TAC. The viral community was clearly dominated by the  
 254 family *Microviridae* whereas the order Caudovirales; *Siphoviridae*, *Podoviridae*, *Myoviridae*, and unclassified  
 255 viruses constituted the remainder. The vendors on LF diet had significantly ( $p < 0.05$ ) less *Microviridae*  
 256 compared to the HF diet, and opposite for Caudovirales expect TAC. See Figure S4 & S5 for the bacterial  
 257 and viral taxonomic binning of individual samples, and Figure S8 for equivalent analysis of the colon  
 258 microbiota.

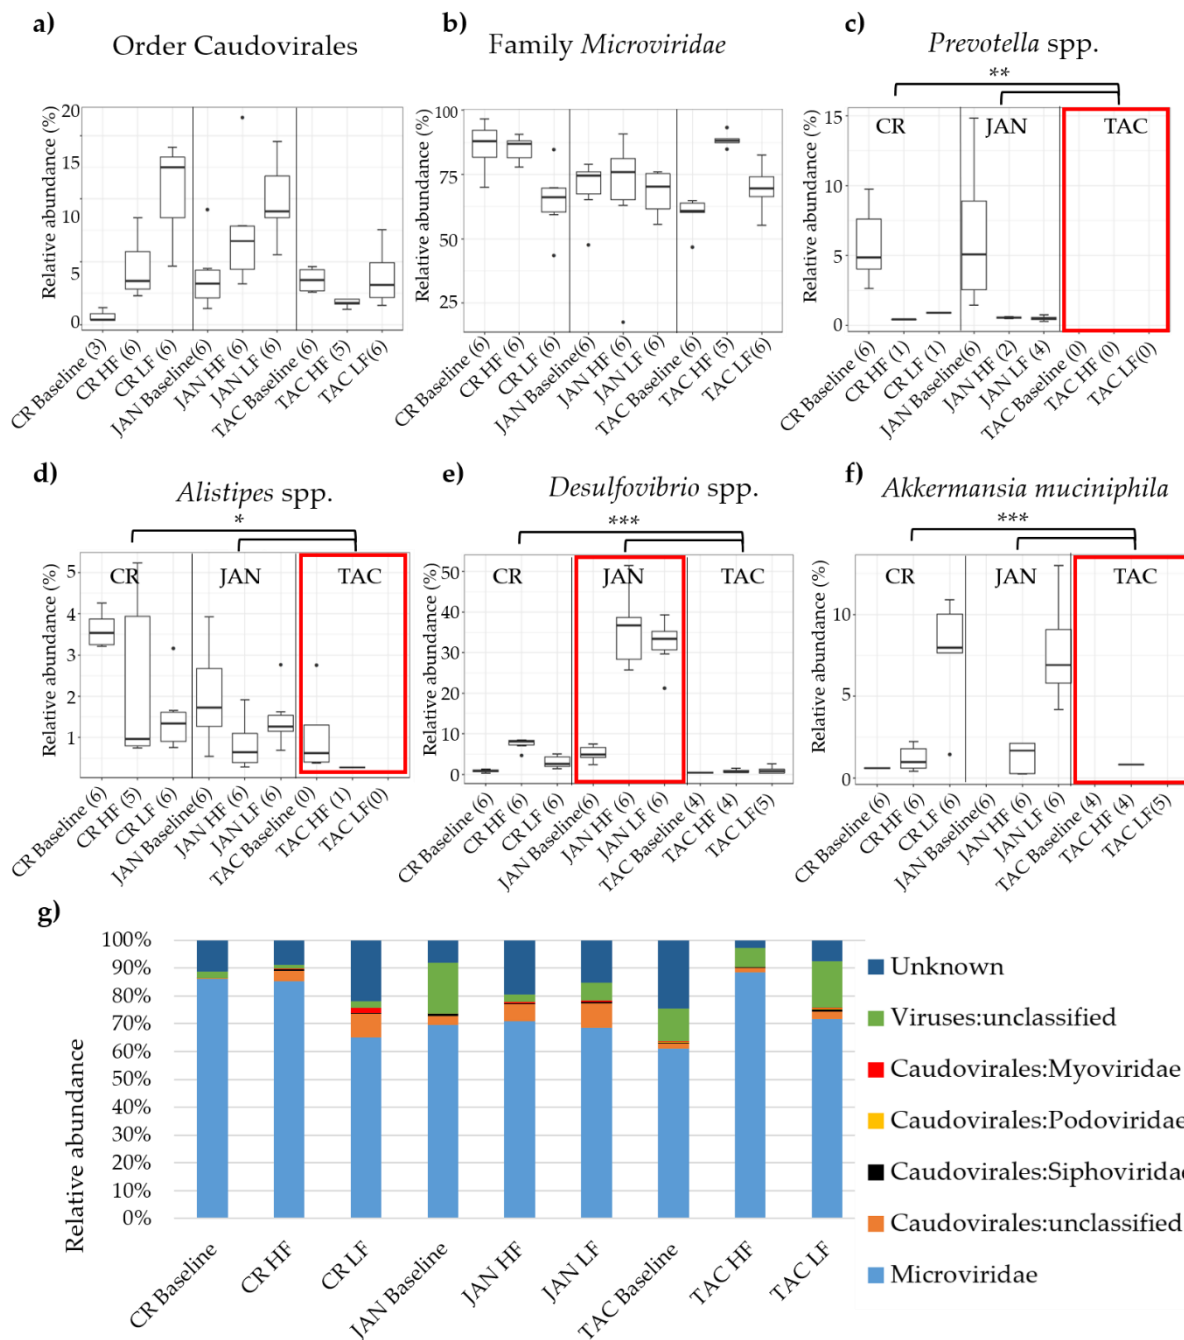



261

262 **Figure 4.** Relative abundance of a) the order Caudovirales and b) the family *Microviridae*. Differences in the  
263 relative abundance of *Prevotella* spp., *Alistipes* spp., *Desulfovibrio* spp., and *Akkermansia muciniphila* between  
264 vendors and diet are illustrated in c), d), e), and f). The most abundant viral taxonomies illustrated by bar  
265 plots in g). Black dots indicate outliers and the red boxes mark the vendor with interesting differences in  
266 bacterial abundance. Black branches and stars mark the significant bacterial differences in abundance between  
267 vendors, \* =  $p < 0.05$ , \*\*  $p < 0.005$ , \*\*\*  $p < 0.0005$  based on pairwise Wilcoxon rank sum test. Abbreviations: LF =  
268 low-fat diet, HF = high-fat diet, CR = Charles River, JAN = Janvier, TAC = Taconic.

269 3.3. Shared taxonomies of viral and bacterial entities amongst three vendors

270 Venn diagrams were made to illustrate the shared bacterial and viral taxonomy between the three  
271 vendors. Venn diagrams for the cecum samples are shown in Figure 5a & 5b. Only a few vOTU's were  
272 shared between mice from the different vendors. At baseline just 1 vOTU that constituted  $\leq 0.05\%$  of the viral  
273 abundance were shared between all three vendors, see Figure 5b & 5c. After the dietary intervention  
274 (endpoint) the HF and LF vendor groups shared, respectively, 18 and 21 vOTU's representing more than  
275 60% of the relative viral abundance. The shared vOTU's only represented *Microviridae*, Caudovirales and  
276 unclassified viruses. Changes of the shared bOTU's from baseline to the endpoint was less dramatic and the  
277 HF and LF vendor groups shared, respectively, 249 and 326 bOTU's, see Figure 5a & 5c. Equivalent analysis  
278 of the colon microbiota can be found in Figure S9.

279

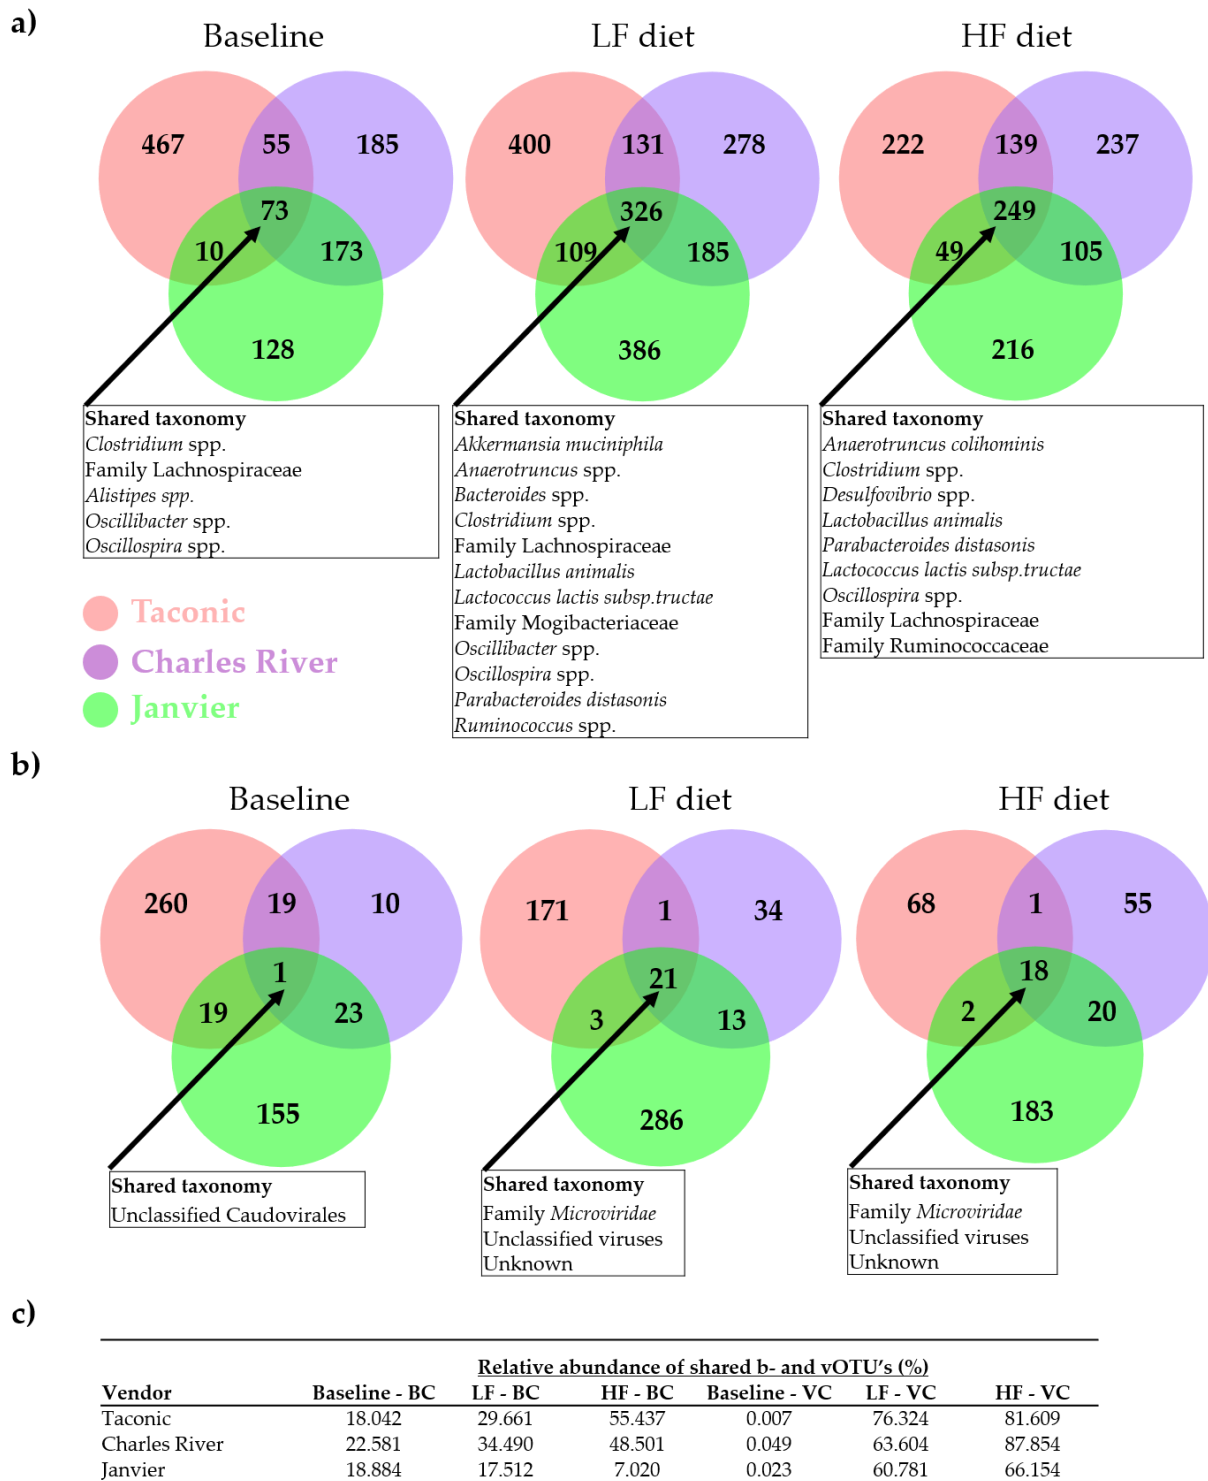

280  
281

282 **Figure 5.** Venn diagrams illustrating the number of shared a) bacterial and b) viral OTUs (b- and vOTU's)  
 283 amongst mice purchased from three vendors at baseline (5 weeks old) and endpoint (18 weeks old) on either  
 284 high-fat (HF) or low-fat (LF) diet. The boxes sum up the shared taxonomy amongst the OTU's. c) Table  
 285 showing the sum of the relative abundance of shared b- and vOTU's from baseline to endpoint. BC = Bacterial  
 286 community, VC = viral community.

#### 287 4. Discussion

288 Here we investigate the impact of vendor and diet (high fat vs. low fat) on the bacterial and viral  
289 community of C57BL/6N (B6) mice purchased from Taconic (TAC), Charles River (CR), and Janvier (JAN).  
290 Overall, we observed that the bacterial and viral community was diet-dependent, which is consistent with  
291 former studies [20,50]. The bacterial and viral composition were affected by both vendor and diet, but  
292 surprisingly, the effect of vendor clearly exceeded the effect of the diet. Mice from all three vendors followed  
293 the same developmental direction in composition from baseline until the endpoint (total 13 weeks). Also,  
294 there was a significant vendor effect on the bacterial and viral  $\alpha$ -diversity, while the diet had no effect on the  
295 bacterial  $\alpha$ -diversity. vOTU's belonging to the family *Microviridae* constituted minimum 60% of the relative  
296 viral abundance, whereas the order of Caudovirales and unclassified viruses represented the rest. Other  
297 studies support that *Microviridae* and Caudovirales are the main components in the human and animal  
298 virome [10]. The application of multiple displacement amplification (MDA) favours ssDNA [29–31] viruses  
299 like *Microviridae*, hence this might have influenced the relative abundance of *Microviridae*, however MDA  
300 was shortened to 30 minutes to minimise this effect. In addition, it should be emphasised that the fraction of  
301 unclassified viruses might encompass Caudovirales or *Microviridae* phages that are not yet characterised.  
302 Only 10 vOTU's constituted the majority (65-93%) of the total relative abundance, Figure S11. The relative  
303 abundance of the vOTU's shared between the vendors clearly increased after being housed under the same  
304 conditions and diets, when compared to the shared vOTU's at baseline, Figure 5c. As previously shown [14],  
305 the bacterial community of mice from the three vendors clustered separately, and differed in the relative  
306 abundance of important gut bacteria. We observed clear differences in the abundances of *Akkermansia*  
307 *muciniphila*, *Desulfovibrio* spp. and *Alistipes* spp. between vendors. *A. muciniphila*, *Prevotella* spp., and *Alistipes*  
308 spp. were almost absent in mice purchased from TAC and remained so even after 13 weeks of LF or HF diet.  
309 *A. muciniphila*, the only member of the genus in mice, has a strong influence on mucosal immune responses  
310 [51], and has been found to be inversely correlated to the incidence of type-1-diabetes in NOD mice [52]. *A.*  
311 *muciniphila* may also offer some protection against type-2-diabetes in diet induced obese (DIO) mice [53],  
312 while it seems to be positively correlated to the development of colon cancer in azoxymethane [54] induced  
313 mice. *Desulfovibrio* spp. are positively correlated with low-grade inflammation and obesity [55]. *Alistipes* spp.  
314 strongly influences metabolic profiles in faeces of mice [56], and in a mouse model of autism a high level of  
315 *Alistipes* spp. in the gut correlated to a low level of serotonin in ileum [57]. Stress induced by housing mice  
316 on grid floors increases the abundance of *Alistipes* spp. [58]. *Prevotella copri* may increase the severity of  
317 dextran sulphate sodium (DSS) induced colitis in mice [59], and the protective effects of *Caspase-3* knockout  
318 in mice may be counteracted by co-housing with wild type mice, because these transfer *Prevotella* spp. to the  
319 knockout mice [60].

320 Howe et al. 2016 suggest that dietary history could have a distinct impact on the viral functional profile  
321 [3]. Furthermore, reproducibility of experiments are challenged by variations in housing conditions [61,62].  
322 Thus, variation in the handling at the vendor housing facilities might explain the difference in the GM  
323 profiles despite the mice were the same B6 strain. So, there are good reasons to assume that mice models  
324 based on mice from each of the three vendors at least in some cases will show phenotypic differences as well.  
325 In conclusion, to the best of our knowledge, this is the first study highlighting significant differences in the  
326 gut viral community of C57BL/6N mice from different vendors. It shows that vendor has pronounced effect  
327 on not only the gut bacterial community, but also the gut virome, which has profound implications for  
328 future studies on the impact of the gut virome on GM interactions and host health.

329

330 **Supplementary Materials:** The following are available online at [www.mdpi.com/xxx/s1](http://www.mdpi.com/xxx/s1), Figure S1: qPCR using 16S  
331 rRNA universal primers, Figure S2: Bacterial and viral  $\alpha$ -diversity analysis with other indices – Cecum, Figure S3:  
332 Bacterial and viral  $\beta$ -diversity analysis with other metrics – Cecum, Figure S4: Bacterial taxonomic binning – Cecum,  
333 Figure S5: Viral taxonomic binning – Cecum, Figure S6: Gut microbiota diversity of C57BL/6N mice from three vendors –  
334 Colon, Figure S7: Gut microbiota composition of C57BL/6N mice from three vendors – Colon, Figure S8: Taxonomic  
335 abundance of the bacterial and viral components – Colon, Figure S9: Shared taxonomies of viral and bacterial entities  
336 amongst three vendors – Colon, Figure S10: Rarefaction of  $\alpha$ -diversity, Figure S11: Top 10 of the most abundant vOTU's  
337 in faecal content from cecum and colon, Table S1: Sequencing details, Table S2: Pairwise comparison of  $\alpha$ -diversity  
338 indices – Cecum, Table S3: Pairwise comparison of  $\beta$ -diversity indices – Cecum.

339 **Author Contributions:** Conceptualization, T.S.R., A.K.H., D.S.N., and F.K.V.; Methodology, T.S.R., A.K.H., D.S.N., and  
340 F.K.V.; Software, T.S.R. and J.C.M.; Validation, T.S.R., W.K., and J.C.M.; Formal Analysis, T.S.R., L.H.H., W.K., J.C.M.,  
341 D.S.N., and F.K.V.; Investigation, T.S.R. and L.V.; Resources, T.S.R. and L.V.; Data Curation, T.S.R. and J.C.M.; Writing –  
342 Original Draft Preparation, T.S.R. and D.S.N.; Writing – Review & Editing, All authors; Visualization, T.S.R.;  
343 Supervision, A.K.H., D.S.N., and F.K.V.; Project Administration, D.S.N. and F.K.V.; Funding Acquisition, D.S.N.

344 **Funding:** Funding was provided by the Danish Council for Independent Research with grant ID: DFF-6111-00316 and  
345 Human Frontiers in Science Programme project (HFSP - RGP0024/2018).

346 **Acknowledgments:** We thank Professor Alejandro Reyes for fruitful discussions regarding pre-processing and analysis  
347 of viral metagenomes. In addition, we thank Helene Farlov and Mette Nelander at Section of Experimental Animal  
348 Models, University of Copenhagen, Denmark for taking care of the animals.

349 **Conflicts of interest:** All authors declare no conflicts of interest.

## 350 References

- 351 1. Marchesi, J.R.; Adams, D.H.; Fava, F.; Hermes, G.D.A. a; Hirschfield, G.M.; Hold, G.; Quraishi, M.N.; Kinross, J.;  
352 Smidt, H.; Tuohy, K.M.; et al. The gut microbiota and host health: A new clinical frontier. *Gut* **2016**, *65*, 330–339.
- 353 2. Tropini, C.; Earle, K.A.; Huang, K.C.; Sonnenburg, J.L. Cell Host & Microbe The Gut Microbiome:  
354 Connecting Spatial Organization to Function. **2017**.
- 355 3. Howe, A.; Ringus, D.L.; Williams, R.J.; Choo, Z.-N.; Greenwald, S.M.; Owens, S.M.; Coleman, M.L.; Meyer, F.;  
356 Chang, E.B. Divergent responses of viral and bacterial communities in the gut microbiome to dietary  
357 disturbances in mice. *ISME J.* **2016**, *10*, 1217–1227.
- 358 4. Sam, Q.H.; Chang, M.W.; Chai, L.Y.A. The Fungal Mycobiome and Its Interaction with Gut Bacteria in the Host.  
359 *Int. J. Mol. Sci.* **2017**, *18*.
- 360 5. Norman, J.M.; Handley, S.A.; Baldridge, M.T.; Droit, L.; Liu, C.Y.; Keller, B.C.; Kambal, A.; Monaco, C.L.; Zhao,  
361 G.; Fleshner, P.; et al. Disease-specific alterations in the enteric virome in inflammatory bowel disease. *Cell* **2015**,  
362 *160*, 447–460.
- 363 6. Zuo, T.; Wong, S.H.; Lam, K.; Lui, R.; Cheung, K.; Tang, W.; Ching, J.Y.L.L.; Chan, P.K.S.S.; Chan, M.C.W.W.;  
364 Wu, J.C.Y.Y.; et al. Bacteriophage transfer during faecal microbiota transplantation in *Clostridium difficile*  
365 infection is associated with treatment outcome. *Gut* **2017**, *67*, 634–643.
- 366 7. Ma, Y.; You, X.; Mai, G.; Tokuyasu, T.; Liu, C. A human gut phage catalog correlates the gut phageome with type  
367 2 diabetes. *Microbiome* **2018**, *6*, 1–12.
- 368 8. Reyes, A.; Haynes, M.; Hanson, N.; Angly, F.E.; Heath, A.C.; Rohwer, F.; Gordon, J.I. Viruses in the faecal  
369 microbiota of monozygotic twins and their mothers. *Nature* **2011**, *466*, 334–338.
- 370 9. Scarpellini, E.; Ianiro, G.; Attili, F.; Bassanelli, C.; De Santis, A.; Gasbarrini, A. The human gut microbiota and  
371 virome: Potential therapeutic implications. *Dig. Liver Dis.* **2015**, *47*, 1007–1012.
- 372 10. Keen, E.C.; Dantas, G. Close Encounters of Three Kinds: Bacteriophages, Commensal Bacteria, and Host

- 373 Immunity. *Trends Microbiol.* **2018**, *0*, 1–12.
- 374 11. Manrique, P.; Dills, M.; Young, M.J. The human gut phage community and its implications for health and  
375 disease. *Viruses* **2017**, *9*.
- 376 12. Tuttle, A.H.; Philip, V.M.; Chesler, E.J.; Mogil, J.S. Comparing phenotypic variation between inbred and outbred  
377 mice. *Nat. Methods* **2018**, *15*, 994–996.
- 378 13. Bercik, P.; Denou, E.; Collins, J.; Jackson, W.; Lu, J.; Jury, J.; Deng, Y.; Blennerhassett, P.; Macri, J.; McCoy, K.D.; et  
379 al. The Intestinal Microbiota Affect Central Levels of Brain-Derived Neurotrophic Factor and Behavior in Mice.  
380 *Gastroenterology* **2011**, *141*, 599–609.e3.
- 381 14. Hufeldt, M.R.; Vogensen, F.K.; Midtvedt, T.; Axel Kornerup, H.; Nielsen, D.S.L.; Majbritt Ravn Hufeldt Finn  
382 Kvist Vogensen, Tore Midtvedt, and Axel Kornerup Hansen, D.S.N.; Hufeldt, M.R.; Vogensen, F.K.; Midtvedt,  
383 T.; Axel Kornerup, H.; et al. Variation in the Gut Microbiota of Laboratory Mice Is Related to Both Genetic  
384 Environmental Factors. *Comp. Med.* **2010**, *60*, 336–342.
- 385 15. Hilbert, T.; Steinhagen, F.; Senzig, S.; Cramer, N.; Bekeredjian-Ding, I.; Parcina, M.; Baumgarten, G.; Hoeft, A.;  
386 Frede, S.; Boehm, O.; et al. Vendor effects on murine gut microbiota influence experimental abdominal sepsis. *J.*  
387 *Surg. Res.* **2017**, *211*, 126–136.
- 388 16. Sadler, R.; Singh, V.; Benakis, C.; Garzetti, D.; Brea, D.; Stecher, B.; Anrather, J.; Liesz, A. Microbiota differences  
389 between commercial breeders impacts the post-stroke immune response. *Brain. Behav. Immun.* **2017**, *66*, 23–30.
- 390 17. Hansen, A.K.; Hansen, C.H.F.; Krych, L.; Nielsen, D.S. Impact of the gut microbiota on rodent models of human  
391 disease. *World J. Gastroenterol.* **2014**, *20*, 17727–17736.
- 392 18. Ivanov, I.I.; Atarashi, K.; Manel, N.; Brodie, E.L.; Shima, T.; Karaoz, U.; Wei, D.; Goldfarb, K.C.; Santee, C.A.;  
393 Lynch, S. V.; et al. Induction of Intestinal Th17 Cells by Segmented Filamentous Bacteria. *Cell* **2009**, *139*, 485–498.
- 394 19. Kriegel, M.A.; Sefik, E.; Hill, J.A.; Wu, H.-J.; Benoist, C.; Mathis, D. Naturally transmitted segmented filamentous  
395 bacteria segregate with diabetes protection in nonobese diabetic mice. *Proc. Natl. Acad. Sci.* **2011**, *108*, 11548–  
396 11553.
- 397 20. Murphy, E.A.; Velazquez, K.T.; Herbert, K.M. Influence of High-Fat-Diet on Gut Microbiota: A Driving Force for  
398 Chronic Disease Risk. *Curr Opin Clin Nutr Metab Care* **2015**, *18*, 515–520.
- 399 21. Ellekilde, M.; Krych, L.; Hansen, C.H.F.H.F.; Hufeldt, M.R.R.; Dahl, K.; Hansen, L.H.H.; Sørensen, S.J.J.;  
400 Vogensen, F.K.K.; Nielsen, D.S.S.; Hansen, A.K.K.; et al. Characterization of the gut microbiota in leptin deficient  
401 obese mice - Correlation to inflammatory and diabetic parameters. *Res. Vet. Sci.* **2014**, *96*, 241–250.
- 402 22. Krych, L.; Kot, W.; Bendtsen, K.M.B.; Hansen, A.K.; Vogensen, F.K.; Nielsen, D.S. Have you tried spermine ? A  
403 rapid and cost-effective method to eliminate dextran sodium sulfate inhibition of PCR and RT-PCR. **2018**, *144*,  
404 1–7.
- 405 23. Edgar, R.C. UPARSE: highly accurate OTU sequences from microbial amplicon reads. *Nat. Methods* **2013**, *10*, 996–  
406 998.
- 407 24. Edgar, R.C. UNOISE2: improved error-correction for Illumina 16S and ITS amplicon sequencing. *bioRxiv* **2016**,  
408 081257.
- 409 25. Edgar, R. SINTAX: a simple non-Bayesian taxonomy classifier for 16S and ITS sequences. *bioRxiv* **2016**, 074161.
- 410 26. Cole, J.R.; Wang, Q.; Fish, J.A.; Chai, B.; Mcgarrell, D.M.; Sun, Y.; Brown, C.T.; Porras-alfaro, A.; Kuske, C.R.;  
411 Tiedje, J.M. Ribosomal Database Project : data and tools for high throughput rRNA analysis. **2014**, *42*, 633–642.
- 412 27. McDonald, D.; Price, M.N.; Goodrich, J.; Nawrocki, E.P.; Desantis, T.Z.; Probst, A.; Andersen, G.L.; Knight, R.;  
413 Hugenholtz, P. An improved Greengenes taxonomy with explicit ranks for ecological and evolutionary analyses  
414 of bacteria and archaea. *ISME J.* **2011**, *6*, 610–618.
- 415 28. Conceição-Neto, N.; Zeller, M.; Lefrère, H.; De Bruyn, P.; Beller, L.; Deboutte, W.; Yinda, C.K.; Lavigne, R.; Maes,



- 416 P.; Van Ranst, M.; et al. Modular approach to customise sample preparation procedures for viral metagenomics:  
417 a reproducible protocol for virome analysis. *Sci. Rep.* **2015**, *5*.
- 418 29. Marine, R.; McCarren, C.; Vorrasane, V.; Nasko, D.; Crowgey, E.; Polson, S.W.; Wommack, K.E.; Nasko, D.;  
419 McCarren, C.; Wommack, K.E.; et al. Caught in the middle with multiple displacement amplification: the myth  
420 of pooling for avoiding multiple displacement amplification bias in a metagenome. *Microbiome* **2014**, *2*, 3.
- 421 30. Zhong, X.; Guidoni, B.; Jacas, L.; Ephan Jacquet, S. Structure and diversity of ssDNA Microviridae viruses in two  
422 peri-alpine lakes (Annecy and Bourget, France). *Res. Microbiol.* **2015**, *166*, 644–654.
- 423 31. Székely, A.J.; Breitbart, M. Single-stranded DNA phages: from early molecular biology tools to recent revolutions  
424 in environmental microbiology. *FEMS Microbiol. Lett.* **2016**, *363*, fnw027.
- 425 32. Bolger, A.M.; Lohse, M.; Usadel, B. Trimmomatic: A flexible trimmer for Illumina sequence data. *Bioinformatics*  
426 **2014**, *30*, 2114–2120.
- 427 33. Wood, D.E.; Salzberg, S.L. Kraken: ultrafast metagenomic sequence classification using exact alignments. *Genome*  
428 *Biol.* **2014**, *15*, R46.
- 429 34. Quast, C.; Pruesse, E.; Yilmaz, P.; Gerken, J.; Schweer, T.; Yarza, P.; Peplies, J.; Glöckner, F.O. The SILVA  
430 ribosomal RNA gene database project: improved data processing and web-based tools. *Nucleic Acids Res.* **2013**,  
431 *41*, D590-6.
- 432 35. Nurk S, Meleshko D, Korobeynikov A, P.P. metaSPAdes: A New Versatile Metagenomic Assembler. *Genome Res.*  
433 **2017**, *1*, 30–47.
- 434 36. Bankevich, A.; Nurk, S.; Antipov, D.; Gurevich, A.A.; Dvorkin, M.; Kulikov, A.S.; Lesin, V.M.; Nikolenko, S.I.;  
435 Pham, S.O.N.; Pribelski, A.D.; et al. SPAdes: A New Genome Assembly Algorithm and Its Applications to  
436 Single-Cell Sequencing. **2012**, *19*, 455–477.
- 437 37. Reyes, A.; Blanton, L. V.; Cao, S.; Zhao, G.; Manary, M.; Trehan, I.; Smith, M.I.; Wang, D.; Virgin, H.W.; Rohwer,  
438 F.; et al. Gut DNA viromes of Malawian twins discordant for severe acute malnutrition. *Proc. Natl. Acad. Sci.*  
439 **2015**, *112*, 201514285.
- 440 38. Arndt, D.; Grant, J.R.; Marcu, A.; Sajed, T.; Pon, A.; Liang, Y.; Wishart, D.S. PHASTER: a better, faster version of  
441 the PHAST phage search tool. *Nucleic Acids Res.* **2016**, *44*, 1–6.
- 442 39. Ren, J.; Ahlgren, N.A.; Lu, Y.Y.; Fuhrman, J.A.; Sun, F. VirFinder: a novel k-mer based tool for identifying viral  
443 sequences from assembled metagenomic data. *Microbiome* **2017**, *5*, 69.
- 444 40. Liao, Y.; Smyth, G.K.; Shi, W. The Subread aligner: Fast, accurate and scalable read mapping by seed-and-vote.  
445 *Nucleic Acids Res.* **2013**, *41*.
- 446 41. Roux, S.; Emerson, J.B.; Eloë-Fadrosh, E.A.; Sullivan, M.B. Benchmarking viromics: an *in silico* evaluation of  
447 metagenome-enabled estimates of viral community composition and diversity. *PeerJ* **2017**, *5*, e3817.
- 448 42. Angly, F.E.; Willner, D.; Prieto-Davó, A.; Edwards, R.A.; Schmieder, R.; Vega-Thurber, R.; Antonopoulos, D.A.;  
449 Barott, K.; Cottrell, M.T.; Desnues, C.; et al. The GAAS metagenomic tool and its estimations of viral and  
450 microbial average genome size in four major biomes. *PLoS Comput. Biol.* **2009**, *5*.
- 451 43. Paulson, J.N.; Stine, O.C.; Bravo, H.C.; Pop, M. Differential abundance analysis for microbial marker-gene  
452 surveys. *Nat. Methods* **2013**, *10*, 1200–1202.
- 453 44. Weiss, S.; Xu, Z.Z.; Peddada, S.; Amir, A.; Bittinger, K.; Gonzalez, A.; Lozupone, C.; Zaneveld, J.R.; Vázquez-  
454 Baeza, Y.; Birmingham, A.; et al. Normalization and microbial differential abundance strategies depend upon  
455 data characteristics. *Microbiome* **2017**, *5*, 27.
- 456 45. Caporaso, J.G.; Kuczynski, J.; Stombaugh, J.; Bittinger, K.; Bushman, F.D.; Costello, E.K.; Fierer, N.; Peña, A.G.;  
457 Goodrich, J.K.; Gordon, J.I.; et al. QIIME allows analysis of high-throughput community sequencing data. *Nat.*  
458 *Methods* **2010**, *7*, 335–336.

- 459 46. McMurdie, P.J.; Holmes, S. Waste Not, Want Not: Why Rarefying Microbiome Data Is Inadmissible. *PLoS*  
460 *Comput. Biol.* **2014**, *10*.
- 461 47. Lozupone, C.; Knight, R. UniFrac: a new phylogenetic method for comparing microbial communities. *Appl.*  
462 *Environ. Microbiol.* **2005**, *71*, 8228–35.
- 463 48. Lagkouravdos, I.; Fischer, S.; Kumar, N.; Clavel, T. Rhea: a transparent and modular R pipeline for microbial  
464 profiling based on 16S rRNA gene amplicons. *PeerJ* **2017**, *5*, e2836.
- 465 49. Wang, Y.; Xu, L.; Gu, Y.Q.; Coleman-Derr, D. MetaCoMET: a web platform for discovery and visualization of the  
466 core microbiome. *Bioinformatics* **2016**, *32*, btw507.
- 467 50. Schulz, M.D.; Atay, Ç.; Heringer, J.; Romrig, F.K.; Schwitalla, S.; Aydin, B.; Ziegler, P.K.; Varga, J.; Reindl, W.;  
468 Pommerenke, C.; et al. High-fat-diet-mediated dysbiosis promotes intestinal carcinogenesis independently of  
469 obesity. *Nature* **2014**, *514*, 508–512.
- 470 51. Derrien, M.; Van Baarlen, P.; Hooiveld, G.; Norin, E.; Müller, M.; de Vos, W.M. Modulation of Mucosal Immune  
471 Response, Tolerance, and Proliferation in Mice Colonized by the Mucin-Degrader *Akkermansia muciniphila*.  
472 *Front. Microbiol.* **2011**, *2*, 166.
- 473 52. Hansen, C.H.F.; Krych, L.; Nielsen, D.S. Early life treatment with vancomycin propagates *Akkermansia*  
474 *muciniphila* and reduces diabetes incidence in the NOD mouse. **2012**, 2285–2294.
- 475 53. Murphy, E.F.; Cotter, P.D.; Hogan, A.; Sullivan, O.O.; Joyce, A.; Fouhy, F.; Clarke, S.F.; Marques, T.M.; Toole,  
476 P.W.O.; Stanton, C.; et al. Divergent metabolic outcomes arising from targeted manipulation of the gut  
477 microbiota in diet-induced obesity. **2013**, 220–226.
- 478 54. Schloss, P.D. The Gut Microbiome Modulates Colon Tumorigenesis. **2013**, *4*, 1–9.
- 479 55. Cid, M.; González, M. Potential benefits of physical activity during pregnancy for the reduction of gestational  
480 diabetes prevalence and oxidative stress. *Early Hum. Dev.* **2016**, *94*, 57–62.
- 481 56. Zhao, Y.; Wu, J.; Li, J. V.; Zhou, N.-Y.; Tang, H.; Wang, Y. Gut Microbiota Composition Modifies Fecal Metabolic  
482 Profiles in Mice. *J. Proteome Res.* **2013**, *12*, 2987–2999.
- 483 57. de Theije, C.G.M.; Wopereis, H.; Ramadan, M.; van Eijndthoven, T.; Lambert, J.; Knol, J.; Garssen, J.; Kraneveld,  
484 A.D.; Oozeer, R. Altered gut microbiota and activity in a murine model of autism spectrum disorders. *Brain*.  
485 *Behav. Immun.* **2014**, *37*, 197–206.
- 486 58. Bangsgaard Bendtsen, K.M.; Krych, L.; Sørensen, D.B.; Pang, W.; Nielsen, D.S.; Josefsen, K.; Hansen, L.H.;  
487 Sørensen, S.J.; Hansen, A.K. Gut Microbiota Composition Is Correlated to Grid Floor Induced Stress and  
488 Behavior in the BALB/c Mouse. *PLoS One* **2012**, *7*, e46231.
- 489 59. Scher, J.U.; Sczesnak, A.; Longman, R.S.; Segata, N.; Ubeda, C.; Bielski, C.; Rostron, T.; Cerundolo, V.; Pamer,  
490 E.G.; Abramson, S.B.; et al. Expansion of intestinal *Prevotella copri* correlates with enhanced susceptibility to  
491 arthritis. *Elife* **2013**, *2013*, 1–20.
- 492 60. Brinkman, B.M.; Becker, A.; Ayiseh, R.B.; Hildebrand, F.; Raes, J.; Huys, G.; Vandenabeele, P. Gut Microbiota  
493 Affects Sensitivity to Acute DSS-induced Colitis Independently of Host Genotype. *Inflamm. Bowel Dis.* **2013**, *19*,  
494 2560–2567.
- 495 61. Ericsson, A.C.; Davis, J.W.; Spollen, W.; Bivens, N.; Givan, S.; Hagan, C.E.; McIntosh, M.; Franklin, C.L. Effects of  
496 vendor and genetic background on the composition of the fecal microbiota of inbred mice. *PLoS One* **2015**, *10*, 1–  
497 19.
- 498 62. Lundberg, R.; Bahl, M.I.; Licht, T.R.; Toft, M.F.; Hansen, A.K. Microbiota composition of simultaneously  
499 colonized mice housed under either a gnotobiotic isolator or individually ventilated cage regime. *Sci. Rep.* **2017**,  
500 *7*, 1–11.
